# Supplementary material
Source: Springer Nature journal article supplement (https://www.springermedizin.de/resource/supplementary/12873_2013_191_MOESM2_ESM.pdf/9431594)
Supplement: MOESM2 [file 9431594]

**Table 2: Teamwork self-assessment tool: TeamMonitor (modified Mayo High Performance Teamwork Scale)**

| Use the following scale to rate the team on each dimension: 0 = never/rarely 1 = inconsistently 2 = consistently na = not applicable |                                                                                                                                         |   |   |   |    |
|--------------------------------------------------------------------------------------------------------------------------------------|-----------------------------------------------------------------------------------------------------------------------------------------|---|---|---|----|
| 1                                                                                                                                    | Do you feel that the leader was recognized by all team members ?                                                                        | 0 | 1 | 2 | na |
| 2                                                                                                                                    | Do you think the leader assured maintenance of an appropriate balance between command authority and team member participation ?         | 0 | 1 | 2 | na |
| 3                                                                                                                                    | Do you feel that each team member demonstrated clear understanding of his/her role ?                                                    | 0 | 1 | 2 | na |
| 4                                                                                                                                    | Do you think the team prompted each other to attend to all significant clinical indicators throughout the scenario ?                    | 0 | 1 | 2 | na |
| 5                                                                                                                                    | Do you think team members verbalized their activities loud when they were actively involved with the patient ?                          | 0 | 1 | 2 | na |
| 6                                                                                                                                    | Do you feel that team members repeated back or paraphrased instructions and clarifications to indicate that they heard them correctly ? | 0 | 1 | 2 | na |
| 7                                                                                                                                    | Do you feel that disagreement of conflicts among team members were adressed without a loss of situation awareness ?                     | 0 | 1 | 2 | na |
| 8                                                                                                                                    | Do you think roles were shifted to adress urgent or emergent events when appropriate ?                                                  | 0 | 1 | 2 | na |
| 9                                                                                                                                    | Do you think team members responded to potential errors or complications with procedures that avoided the error or complication ?       | 0 | 1 | 2 | na |

**Comments:**

**Please rate conservatively: Most teams that have not worked extensively together do not consistently demonstrate many of the qualities.**
